1 **Vaccines provide disproportional protection to the increased hospitalisation risk posed**  
2 **by the Delta variant of SARS-CoV2: a meta-analysis**

3

4 Mirre J P Simons

5

6 School of Biosciences, University of Sheffield, Sheffield, United Kingdom.

7 Western Bank, S10 2TN, Sheffield, United Kingdom.

8 m.simons@sheffield.ac.uk

9

10

11 **Abstract**

12 Variants of SARS-CoV2 that achieved global dominance (Alpha and Delta) have been  
13 associated with increased hospitalisation risk. A quantification of this risk across studies is  
14 currently lacking for Delta. Furthermore, how risk for severe disease changes in both  
15 vaccinated and unvaccinated individuals is important as the underlying risks determine public  
16 health impact. The surplus risk of Delta versus Alpha on hospitalisation was determined  
17 using random-effects meta-analysis. Infection with the Delta compared to the Alpha variant  
18 increased hospitalisation risk (unvaccinated: log HR 0.62, CI: 0.41 – 0.84,  $P < 0.0001$ ; linear  
19 HR 1.87). This finding should inform our response to future variants of concern, currently  
20 Omicron. SARS-CoV2 variants that achieve dominance, have achieved this through a higher  
21 rate of infection and this evolutionary trajectory has also come with a correlated higher risk  
22 of severe disease. The surplus risk posed by Delta was significantly lower however in the  
23 vaccinated (model estimate -0.40, CI: -0.73 – -0.07,  $P = 0.017$ ). Vaccination thus provided a  
24 disproportionate level of protection to hospitalisation with the Delta variant and provides  
25 further rationale for vaccination for SARS-CoV2 as a durable public health measure.

26 **Main text**

27

28 During the SARS-CoV2 pandemic a key question was do vaccines work? After the  
29 emergence of variants focus shifted to whether vaccines still provide protection. Both these  
30 questions have been answered with a resounding yes thus far<sup>1</sup>. However, a largely overlooked  
31 and understudied question has been if vaccines protect against the increased severe disease  
32 risk that has now been suggested for the two variants that achieved global dominance, Alpha  
33 (B.1.1.7)<sup>2-4</sup> and Delta (B.1.617)<sup>5</sup>. A quantification of this risk and its interplay with the  
34 protection offered by vaccination across studies is currently lacking for Delta. Vaccines could  
35 provide proportional protection, i.e. lower the increased hazard of hospitalisation posed by a  
36 variant by a similar proportional amount, could be escaped or provide disproportional  
37 protection. Note, such an analysis is different to studying vaccine effectiveness, as this is a  
38 ratio of risks resulting from infection with the same variant. The consideration of how risk  
39 changes with a new variant is of utmost concern. Even when vaccine effectiveness is  
40 unaffected, the underlying risks for both categories, vaccinated and unvaccinated can still be  
41 higher (or lower), changing the impact on public health of a variant. The recent emergence of  
42 Omicron has again highlighted this importance.

43

44 Hospitalisation risk was used as a proxy for disease severity and a meta-analysis was  
45 performed across studies to quantify the risk of the Alpha versus the Delta variant in the  
46 unvaccinated and vaccinated. The number of studies that estimated the hospitalisation risk of  
47 Delta versus Alpha for both vaccinated and unvaccinated individuals is relatively low.  
48 Perhaps explained by the demand put on the data to conduct such analyses. Longitudinal data  
49 on patients and their outcomes are required and only during the rapid gain in dominance of  
50 Delta can reliable comparisons be made. Moreover, adjustment for differences in  
51 confounding variables, such as age, are required for effective estimation of the true effect<sup>4</sup>.  
52 Five studies<sup>5-9</sup> included estimates for both vaccinated and unvaccinated individuals. Three  
53 studies<sup>10-12</sup> were identified with known vaccination status from which the hospitalisation risk  
54 of Delta could be extracted only for the unvaccinated. Vaccination was not separated by  
55 vaccine type in these studies but given the countries where the included studies were  
56 conducted in, the vaccines used are a combination of BNT162b2, mRNA-1273 and  
57 ChAdOx1 nCoV-19.

58

59 Infection with the Delta compared to the Alpha variant increased hospitalisation risk (Figure  
60 1; Table S1; unvaccinated: log HR 0.62, CI: 0.41 – 0.84,  $P < 0.0001$ ; linear HR 1.87). This  
61 risk was significantly lower in the vaccinated individuals (Table S1, model estimate of  
62 vaccination: log HR -0.40, CI: -0.73 – -0.07,  $P = 0.017$ ). When data was split for first and  
63 second doses, second doses showed the strongest response (Table S2, but note only two  
64 studies included estimates for single dosage). Estimates of these vaccination status specific  
65 risks remained similar and statistically significant when the three studies that only estimated  
66 risk in the unvaccinated were excluded (Table S3-S4). Within the vaccinated individuals  
67 there was an increased risk posed by Delta (log HR 0.20, CI: -0.1766 – 0.5842; linear HR  
68 1.22) but this was not significantly different from zero ( $P = 0.29$ ). Vaccination provides a  
69 disproportionate level of protection to hospitalisation with the Delta variant.

70

71 As with the Alpha variant, the Delta variant is associated with a larger risk of severe disease,  
72 most prominent in the unvaccinated. This finding should inform our response to future  
73 variants of concern, currently Omicron. SARS-CoV2 variants that achieve dominance, have  
74 achieved this through a higher rate of infection and this evolutionary trajectory has also come  
75 with a correlated higher risk of severe disease. These consequences were now seen twice  
76 during the pandemic, with both Alpha and Delta. Fortunately, vaccination reduces  
77 hospitalisation risk. For Delta there is even a disproportionate rescue of surplus  
78 hospitalisation risk compared to Alpha (Figure 1), and limited data available for Alpha also  
79 support this notion compared to the wildtype variant (two studies<sup>7,13</sup>, Table S5). Such a  
80 response could be due to several currently unknown reasons. For example, specific aspects of  
81 immunity<sup>14</sup> primed by vaccination or a disproportionate rescue by vaccination of the gained  
82 virulence of variants of concern.

83

84 The data summarised here through meta-analysis provide unique insight into how variants of  
85 concern have impacted the SARS-CoV2 pandemic. The disproportionate rescue from  
86 hospitalisation risk through vaccination identified provides additional support for vaccination  
87 as a durable public health intervention. The gain in virulence in both Alpha and Delta in the  
88 unvaccinated does pose a warning for future variants when vaccination coverage is low or  
89 spread of the variant is wide. In practice, estimating the impact of novel variants of concern  
90 on risk to develop severe disease can only be conducted on a very small timescale and easily  
91 becomes confounded<sup>4</sup> by e.g. improvements in treatment, changes in demography and  
92 vaccine waning<sup>15</sup>. With both Alpha, and Delta, and now Omicron, a loss (or regain) of

93 template amplification in the majority of qPCR tests provided a reliable and convenient proxy  
94 for which variant a patient is infected with. Future variants need not provide such  
95 convenience. Moreover, the faster a variant gains dominance the smaller the time window in  
96 which accurate comparisons can be made. In that case, in a public health setting a rapid shift  
97 in the demography (e.g. vaccinated versus unvaccinated) and number of hospitalisations over  
98 time is probably most informative of the severity of a variant of concern identified and its  
99 interaction with vaccination status. The prior known history of evolutionarily successful  
100 variants showing increased severe disease risk would however warrant caution upon  
101 identification of spread of a novel variant over relying on real-time data.

102

### 103 **Methods**

104 Literature search (final search 10 December 2021) was conducted in Google Scholar using  
105 the following search terms: "hospitalisation OR hospitalization" risk B.1.1.7 B.1.617  
106 vaccinated ("hazard ratio" OR HR). Inclusion criteria were that hospitalisation risk of Delta  
107 versus Alpha infection was reported per vaccination category. Hospitalisation risk did not  
108 include emergency room attendance if this was reported separately. Adjusted hazard (or risk)  
109 ratios were extracted as adjusted for the covariates included in each study. No exclusion  
110 criteria were formulated. The search yielded 230 results (see PRISMA guide, Figure S1) and  
111 returned 8 eligible studies. For the post-hoc search for Alpha specific papers (yielding two  
112 studies), the literature was queried again and references within papers collated for the Delta  
113 search selecting for studies that included estimates for both vaccinated and unvaccinated  
114 individuals. We collected adjusted hazard or risk ratios as reported in text, tables or derived  
115 from combining coefficients from models reported. These were log (natural) transformed and  
116 the corresponding standard errors were derived from the reported linear confidence intervals  
117 for use in meta-analysis. Random effects meta-analysis was conducted in *metafor*<sup>16</sup> in R and  
118 included study as a random term, to correct for multiple effect sizes per study.

119

### 120 **Funding**

121 Sir Henry Dale Fellowship (Wellcome and Royal Society; 216405/Z/19/Z) and an Academy  
122 of Medical Sciences Springboard Award (the Wellcome Trust, the Government Department  
123 of Business, Energy and Industrial Strategy (BEIS), the British Heart Foundation and  
124 Diabetes UK).

125 **Figures**

126

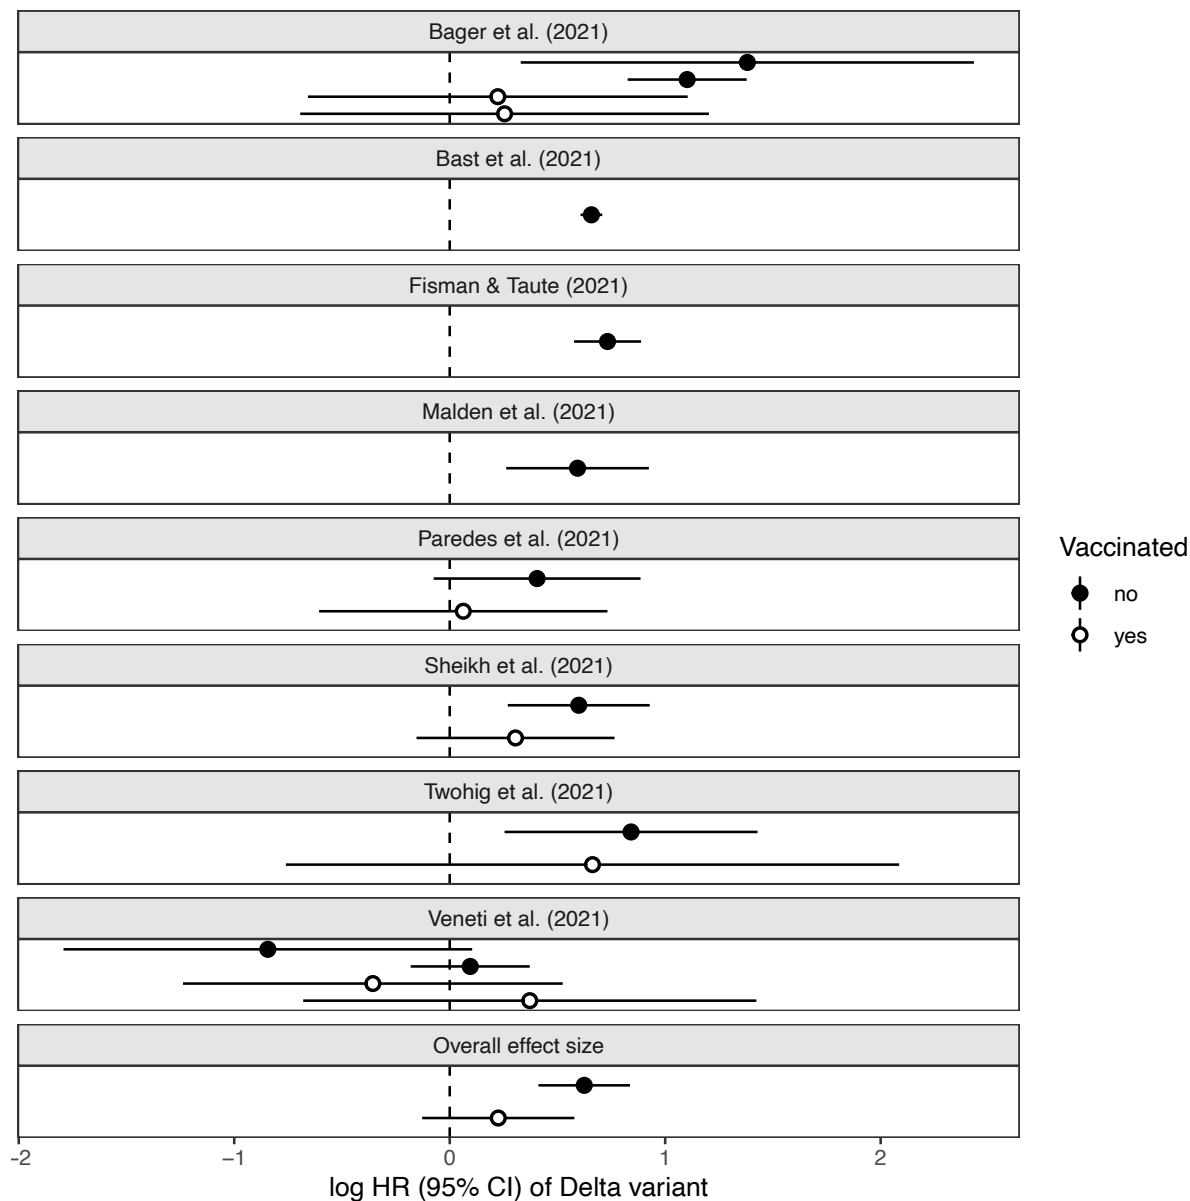

127

128

129 **Figure 1.** Individual effect sizes per study for hospitalisation risk of Delta versus Alpha, split  
130 for vaccination status. Overall effect sizes as estimated through random-effects meta-analysis  
131 are shown at the bottom of the figure.

132 **Supplementary Tables**

133

134 **Table S1.** Meta-analytic model estimating the risk of Delta versus Alpha for hospitalisation  
135 across the 8 studies included.

|                          | log HR estimate | CI lower | CI upper | P        |
|--------------------------|-----------------|----------|----------|----------|
| unvaccinated (reference) | 0.624           | 0.412    | 0.837    | < 0.0001 |
| vaccinated               | -0.399          | -0.726   | -0.072   | 0.017    |

136

137

138 **Table S2.** Meta-analytic model estimating the risk of Delta versus Alpha for hospitalisation  
139 across the 8 studies included, separated by vaccination dose. Note only two estimates for  
140 single dosing were available across the dataset.

141

|                          | log HR estimate | CI lower | CI upper | P        |
|--------------------------|-----------------|----------|----------|----------|
| unvaccinated (reference) | 0.625           | 0.413    | 0.838    | < 0.0001 |
| one dose                 | -0.300          | -1.025   | 0.424    | 0.417    |
| two doses                | -0.421          | -0.780   | -0.063   | 0.021    |

142 **Table S3.** Meta-analytic model estimating the risk of Delta versus Alpha for hospitalisation  
143 across the 5 studies included that estimated risk within vaccinated and unvaccinated  
144 individuals.

|                          | log HR estimate | CI lower | CI upper | P     |
|--------------------------|-----------------|----------|----------|-------|
| unvaccinated (reference) | 0.596           | 0.231    | 0.961    | 0.001 |
| vaccinated               | -0.388          | -0.721   | -0.056   | 0.022 |

145

146 **Table S4.** Meta-analytic model estimating the risk of Delta versus Alpha for hospitalisation  
147 across the 5 studies included that estimated risk within the vaccinated and unvaccinated  
148 individuals, separated by vaccination dose. Note only two estimates for single dosing were  
149 available across the dataset.

|                          | log HR estimate | CI lower | CI upper | P     |
|--------------------------|-----------------|----------|----------|-------|
| unvaccinated (reference) | 0.598           | 0.232    | 0.963    | 0.001 |
| one dose                 | -0.295          | -1.021   | 0.432    | 0.427 |
| two doses                | -0.410          | -0.775   | -0.045   | 0.028 |

150

151 **Table S5.** Meta-analytic model estimating the risk of Delta versus Alpha for hospitalisation  
152 across the 2 studies that estimated the risk of Alpha compared to Wildtype variant in  
153 vaccinated and unvaccinated individuals.

154

|                          | log HR estimate | CI lower | CI upper | P        |
|--------------------------|-----------------|----------|----------|----------|
| unvaccinated (reference) | 0.360           | 0.229    | 0.490    | < 0.0001 |
| vaccinated               | -0.403          | -0.895   | 0.089    | 0.108    |

155

156

157 **References**

- 158 1. Liu, Q., Qin, C., Liu, M. & Liu, J. Effectiveness and safety of SARS-CoV-2 vaccine in  
159 real-world studies: a systematic review and meta-analysis. *Infect. Dis. Poverty* **10**, 1–  
160 15 (2021).
- 161 2. Lin, L., Liu, Y., Tang, X. & He, D. The Disease Severity and Clinical Outcomes of the  
162 SARS-CoV-2 Variants of Concern. *Front. Public Heal.* **9**, 1929 (2021).
- 163 3. Grint, D. J. *et al.* Severity of SARS-CoV-2 alpha variant (B.1.1.7) in England. *Clin.*  
164 *Infect. Dis. An Off. Publ. Infect. Dis. Soc. Am.* (2021). doi:10.1093/CID/CIAB754
- 165 4. Cevik, M. & Mishra, S. SARS-CoV-2 variants and considerations of inferring  
166 causality on disease severity. *Lancet Infect. Dis.* **21**, 1472–1474 (2021).
- 167 5. Twohig, K. A. *et al.* Hospital admission and emergency care attendance risk for  
168 SARS-CoV-2 delta (B.1.617.2) compared with alpha (B.1.1.7) variants of concern: a  
169 cohort study. *Lancet Infect. Dis.* (2021). doi:10.1016/S1473-3099(21)00475-8
- 170 6. Bager, P., Wohlfahrt, J., Rasmussen, M., Albertsen, M. & Krause, T. G.  
171 Hospitalisation associated with SARS-CoV-2 delta variant in Denmark. *Lancet Infect.*  
172 *Dis.* **21**, 1351 (2021).
- 173 7. Paredes, M. I. *et al.* Associations between SARS-CoV-2 variants and risk of COVID-  
174 19 hospitalization among confirmed cases in Washington State: a retrospective cohort  
175 study. *medRxiv Prepr. Serv. Heal. Sci.* (2021). doi:10.1101/2021.09.29.21264272
- 176 8. Sheikh, A., McMenamin, J., Taylor, B. & Robertson, C. SARS-CoV-2 Delta VOC in  
177 Scotland: demographics, risk of hospital admission, and vaccine effectiveness. *Lancet*  
178 **397**, 2461–2462 (2021).
- 179 9. Veneti, L. *et al.* No difference in risk of hospitalisation between reported cases of the  
180 SARS-CoV-2 Delta variant and Alpha variant in Norway. *Int. J. Infect. Dis.* (2021).  
181 doi:10.1016/J.IJID.2021.12.321
- 182 10. Bast, E., Tang, F., Dahn, J. & Palacio, A. Increased risk of hospitalisation and death  
183 with the delta variant in the USA. *Lancet Infect. Dis.* **21**, 1629–1630 (2021).
- 184 11. Malden, D. E. *et al.* Distribution of SARS-CoV-2 Variants in a Large Integrated  
185 Health Care System — California, March–July 2021. *MMWR. Morb. Mortal. Wkly.*  
186 *Rep.* **70**, 1415–1419 (2021).
- 187 12. Fisman, D. N. & Tuite, A. R. Evaluation of the relative virulence of novel SARS-CoV-  
188 2 variants: a retrospective cohort study in Ontario, Canada. *CMAJ* **193**, E1619–E1625  
189 (2021).
- 190 13. Bager, P. *et al.* Risk of hospitalisation associated with infection with SARS-CoV-2



- 191 lineage B.1.1.7 in Denmark: an observational cohort study. *Lancet Infect. Dis.* **21**,  
192 1507–1517 (2021).
- 193 14. Teijaro, J. R. & Farber, D. L. COVID-19 vaccines: modes of immune activation and  
194 future challenges. *Nat. Rev. Immunol.* 2021 214 **21**, 195–197 (2021).
- 195 15. Chemaitelly, H. *et al.* Waning of BNT162b2 Vaccine Protection against SARS-CoV-2  
196 Infection in Qatar. *N. Engl. J. Med.* **385**, e83 (2021).
- 197 16. Viechtbauer, W. Conducting Meta-Analyses in R with the metafor Package. *J. Stat.*  
198 *Softw.* **36**, 1–48 (2010).  
199  
200  
201

202 **Supplementary Figure 1.** PRISMA Flow diagram of the literature search conducted.

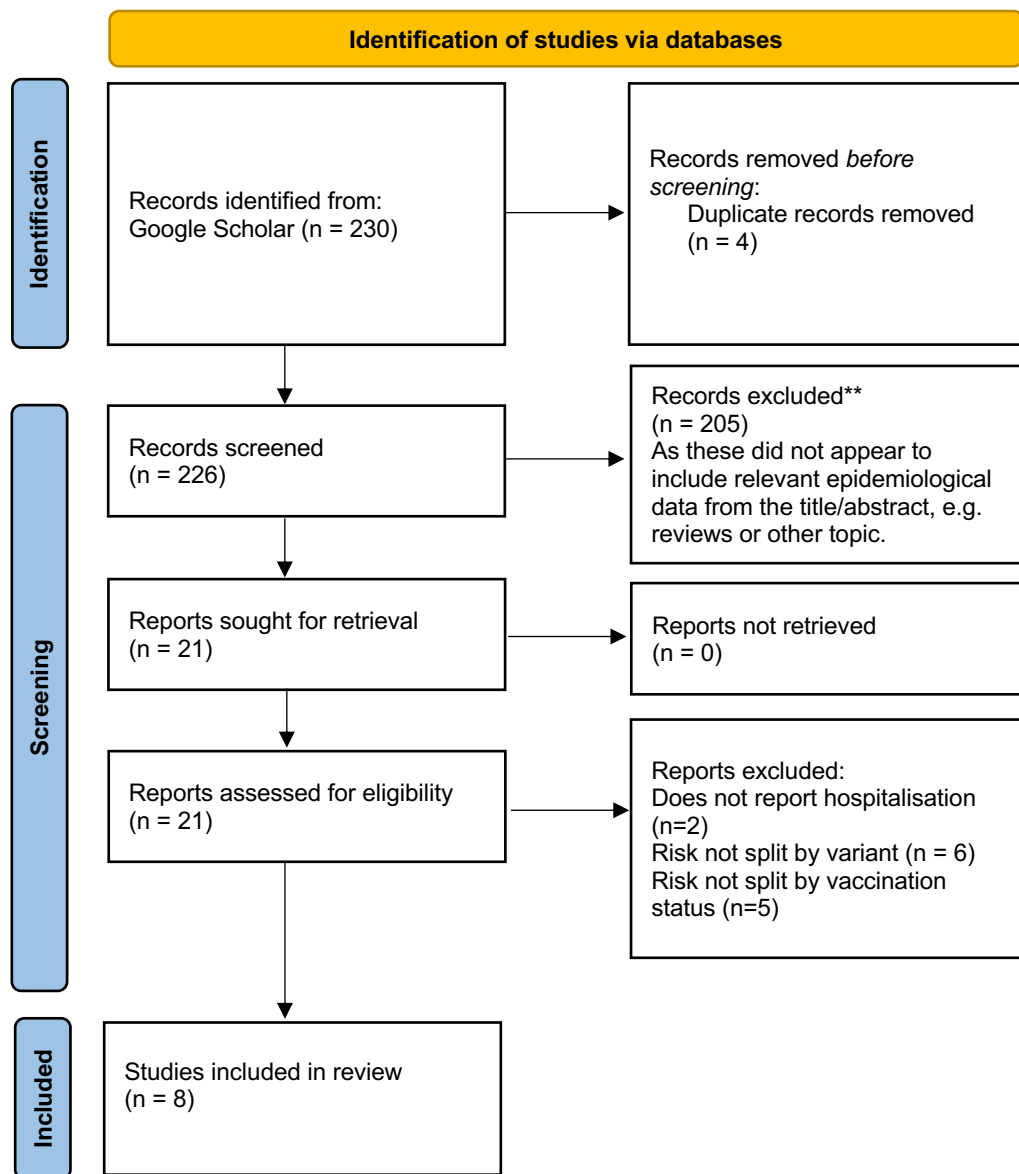

203

β
